# Supplementary material for: Endometrial Cancer Detection Using a Cervical DNA Methylation Assay (MPap) in Women with Abnormal Uterine Bleeding: A Multicenter Hospital-Based Validation Study
Source: MDPI journal article supplement (doi:10.3390/cancers14174343), 2022-09-05
Supplement: s1 [file s1]

SUPPLEMENTAL INFORMATION

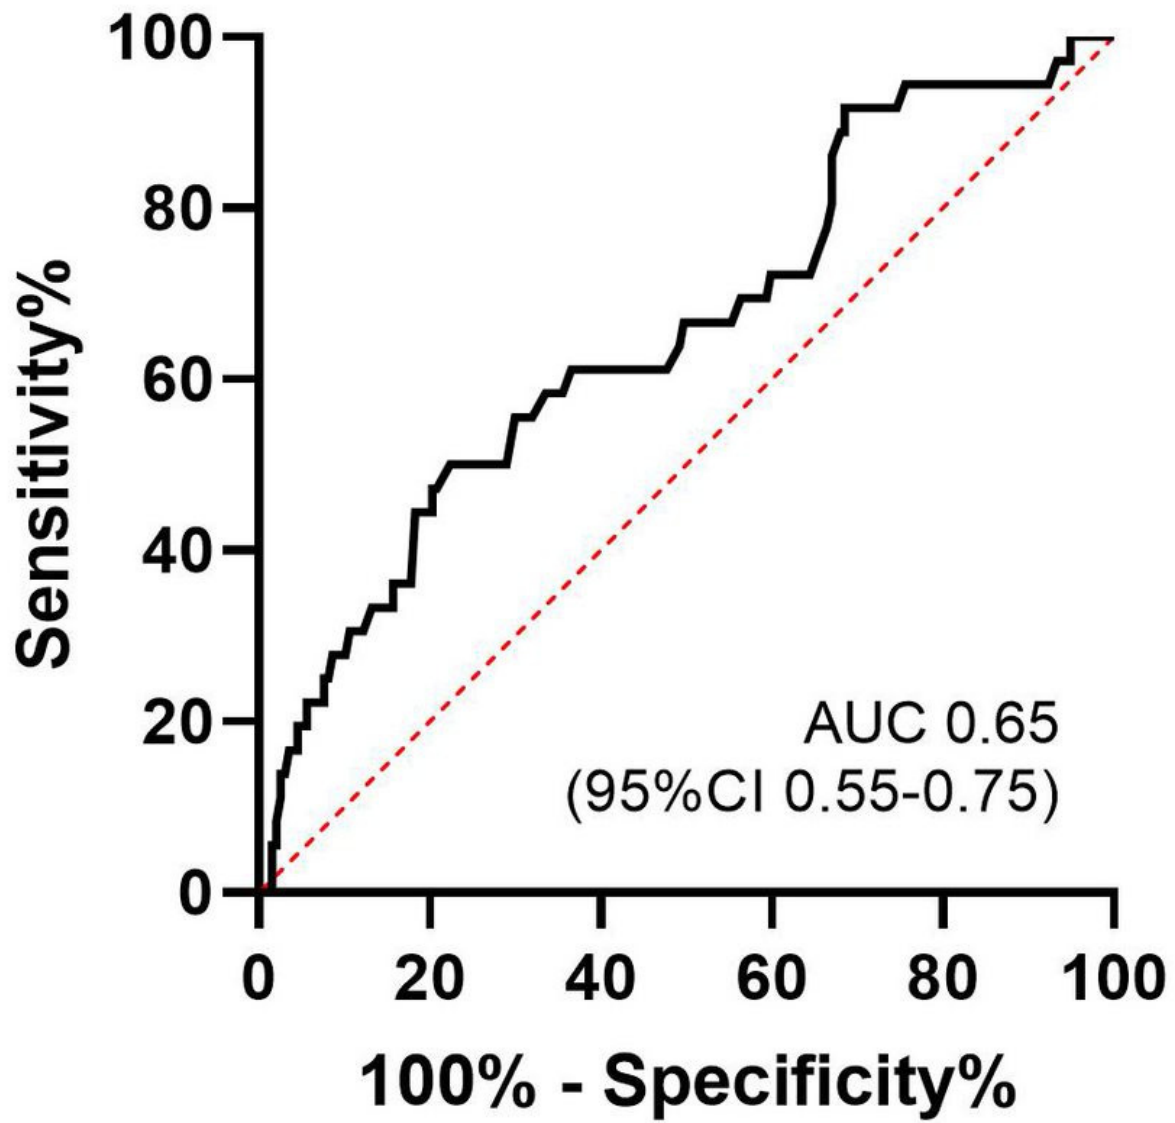

**Figure S1.** The AUC for different ET thicknesses in detection of EC.

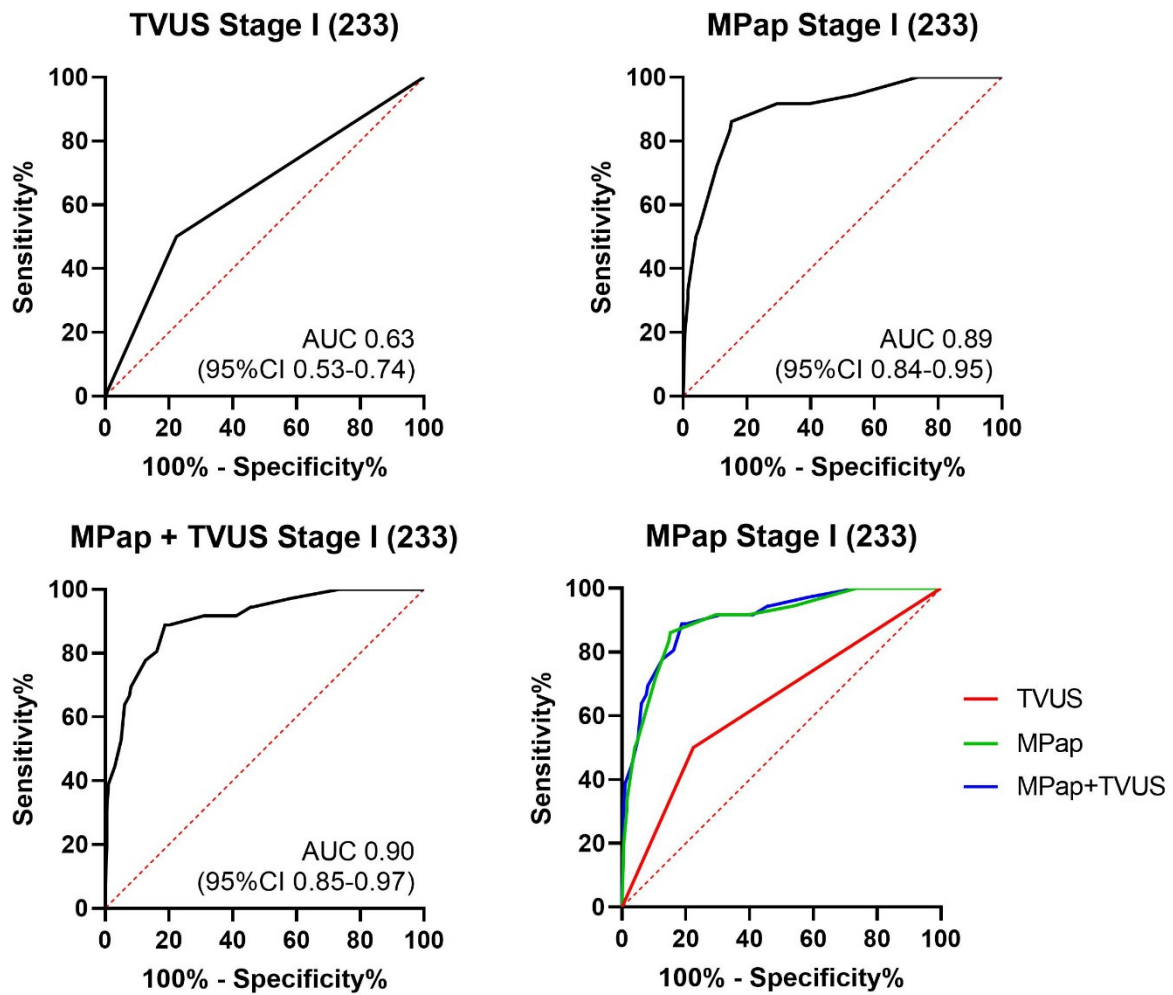

**Figure S2.** The complement of MPap assay with or without TVUS in stage 1.

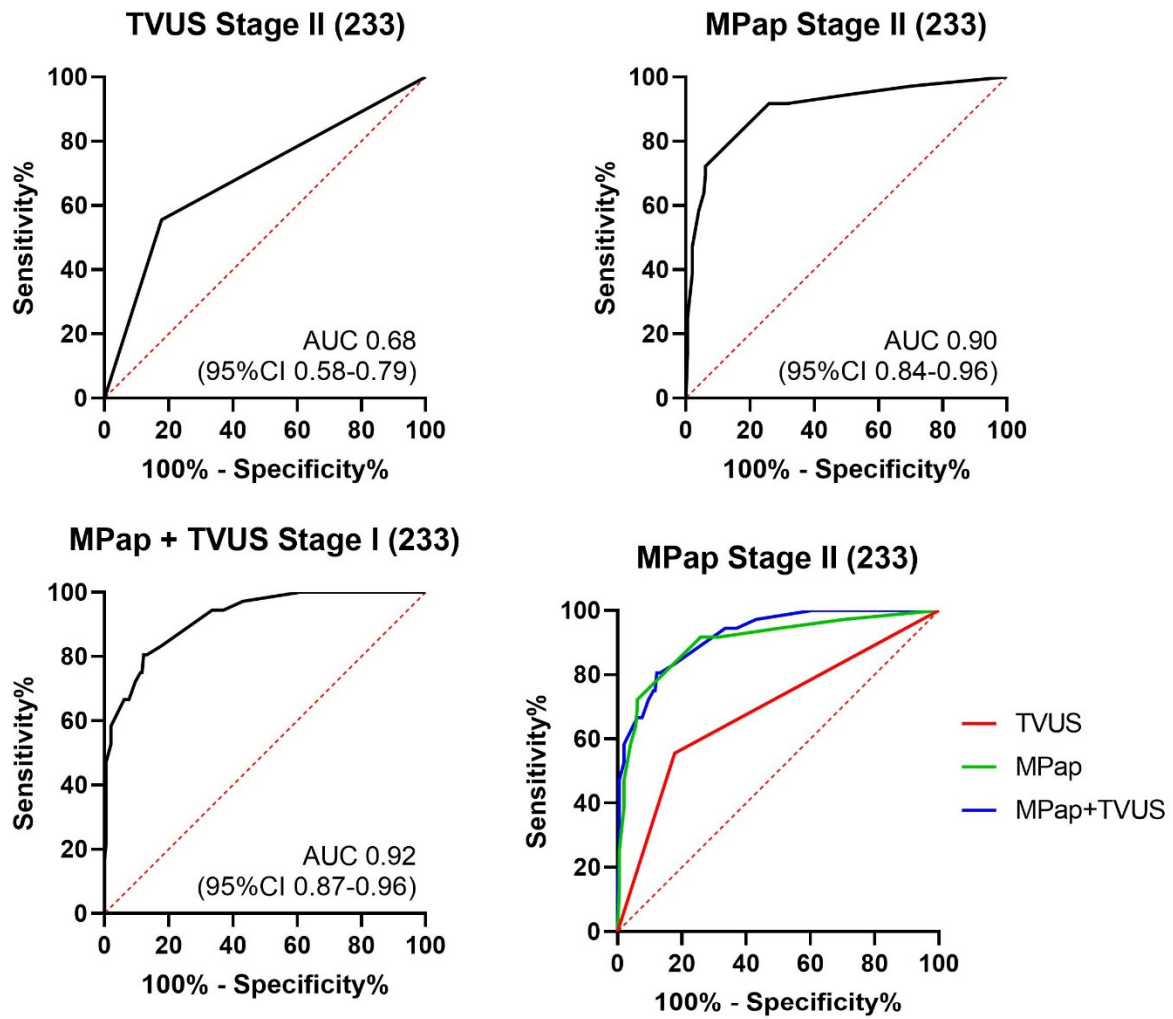

**Figure S3.** The complement of MPap assay with or without TVUS in stage 2.

**Table S1.** Classification of endometrial pathology.

|                                             |                                                                                                                                                                |
|---------------------------------------------|----------------------------------------------------------------------------------------------------------------------------------------------------------------|
| <i>Normal physiological change (Normal)</i> | Proliferative phase of the endometrium<br>Secretory phase of the endometrium<br>Menstrual phase of the endometrium<br>Atrophic postmenopausal endometrium      |
| <i>Benign endometrial lesions (Benign)</i>  | Endometrial metaplasia<br>Specific or nonspecific endometritis<br>Endometrial polyp<br>Submucosal leiomyoma<br>Disordered proliferative endometrium            |
| <i>Precancerous change (Hyperplasia)</i>    | Endometrial hyperplasia<br>Atypical endometrial hyperplasia<br>Endometrial intraepithelial neoplasia                                                           |
| <i>Endometrial cancer (EC)</i>              | Endometrioid adenocarcinoma<br>Carcinosarcoma<br>Clear cell adenocarcinoma<br>Mixed carcinoma<br>Serous adenocarcinoma<br>Undifferentiated carcinoma<br>Others |

**Table S2.** Characteristics of EC.

| <i>Characteristics</i> |            | <i>Stage 1*</i> | <i>Stage 2*</i> | <i>P value</i> |
|------------------------|------------|-----------------|-----------------|----------------|
|                        |            | <i>n=42</i>     | <i>n=39</i>     |                |
| <i>Cancer Type</i>     | <i>I</i>   | 37 (88)         | 33 (85)         | 0.6480         |
|                        | <i>II</i>  | 5 (12)          | 6 (15)          |                |
| <i>Cancer Stage</i>    | <i>I</i>   | 29 (69)         | 29 (74)         | 0.3210         |
|                        | <i>II</i>  | 4 (10)          | 1 (3)           |                |
|                        | <i>III</i> | 7 (17)          | 7 (18)          |                |
|                        | <i>IV</i>  | 2 (5)           | 2 (5)           |                |
| <i>Cancer Grade</i>    | <i>1</i>   | 16 (38)         | 17 (44)         | 0.8110         |
|                        | <i>2</i>   | 18 (43)         | 14 (36)         |                |
|                        | <i>3</i>   | 8 (19)          | 8 (21)          |                |

\* Data are shown as n (%) unless otherwise indicated.

**Table S3.** MPap values of the participants.

| <i>Cohort</i>  |                    | <i>Normal</i> | <i>Benign</i> | <i>Precancerous</i> | <i>EC</i> | <i>P Value</i> |
|----------------|--------------------|---------------|---------------|---------------------|-----------|----------------|
| <i>Stage 1</i> | <i>n</i>           | 138           | 45            | 24                  | 42        |                |
|                | <i>MPap value*</i> | -3.3(1.6)     | -3.1(1.7)     | -2.9(1.8)           | 0.2(1.8)  | <0.0001        |
| <i>Stage 2</i> | <i>n</i>           | 86            | 83            | 37                  | 39        |                |
|                | <i>MPap value*</i> | -3.4(1.4)     | -3.5(1.5)     | -3.7(1.5)           | -0.5(1.9) | <0.0001        |

\* Data are shown as Mean (Standard Deviation).

**Table S4.** Comparison of different thresholds of the MPap value for EC detection.

| <i>MPap value</i> | <i>Stage 1*</i>  | <i>Stage 2*</i>   |
|-------------------|------------------|-------------------|
| <i>AUC</i>        | 0.91 (0.87-0.94) | 0.90 (0.84-0.95)  |
| <i>Sen</i>        | 92.9 (80.5-98.5) | 92.5 (82.9-100.0) |
| <i>Spe</i>        | 71.5 (64.8-77.5) | 73.8 (67.6-79.4)  |
| <i>PPV</i>        | 39.8 (34.4-45.5) | 40.2 (30.8-50.5)  |
| <i>NPV</i>        | 98.0 (94.3-99.3) | 98.1 (95.8-100.0) |

\* Data % are within the 95% CIs unless otherwise indicated.

The cutoff threshold of the MPap value is -2.10.

Sen: sensitivity; Spe: specificity; PPV: positive predictive value; NPV: negative predictive value.

**Table S5.** MPap performance in centers from northern, central, and southern Taiwan.

| <i>Centers</i>  | <i>Subtotal</i> | <i>EC (n)</i> | <i>Non-EC</i> | <i>Sen (%)</i> | <i>Spe (%)</i> | <i>P Value</i> |
|-----------------|-----------------|---------------|---------------|----------------|----------------|----------------|
|                 | <i>(n)</i>      |               | <i>(n)</i>    |                |                |                |
| <i>Northern</i> | 236             | 33            | 203           | 90.9           | 73.4           | 0.39           |
| <i>Central</i>  | 103             | 6             | 97            | 83.3           | 70.1           |                |
| <i>Southern</i> | 152             | 42            | 110           | 95.2           | 72.7           |                |

EC, endometrial cancer; Sen: sensitivity; Spe: specificity.



**Table S6.** Performance of the MPap test for the detection of different histological types of EC.

| <i>Histological type</i>                   | <i>Stage 1 MPap high risk*</i> | <i>Stage 2 MPap high risk*</i> |
|--------------------------------------------|--------------------------------|--------------------------------|
| <i>Endometrioid adenocarcinoma</i>         | 35/37 (95%)                    | 30/33 (91%)                    |
| <i>Carcinosarcoma</i>                      | 1/2 (50%)                      | 3/3 (100%)                     |
| <i>Clear cell adenocarcinoma</i>           | 1/1 (100%)                     | 0                              |
| <i>Desmoplastic small round cell tumor</i> | 0                              | 1/1 (100%)                     |
| <i>Mixed carcinoma</i>                     | 2/2 (100%)                     | 0                              |
| <i>Serous adenocarcinoma</i>               | 0                              | 1/1 (100%)                     |
| <i>Undifferentiated carcinoma</i>          | 0                              | 1/1 (100%)                     |

\*Data are shown as n or n (%) of the EC cases.

**Table S7.** The frequency of diagnosing EC among IVPs from the Taiwan Cancer

Registry Database.

| <i>Age</i>             |                        | <i>NHI data</i> | <i>MPap value</i> |                 |
|------------------------|------------------------|-----------------|-------------------|-----------------|
|                        |                        | <i>n</i>        | <i>High risk</i>  | <i>Low risk</i> |
| <b>50 years+</b>       | <i>IVPs</i>            | 17752           | 5393              | 12359           |
|                        | <i>EC</i>              | 1119            | 1035              | 84              |
|                        | <i>NonEC</i>           | 16633           | 4358              | 12275           |
|                        | <i>IVPs/per EC</i>     | 15.9            | 5.2               |                 |
|                        | <i>Triage IVPs (%)</i> |                 |                   | 69.1            |
| <b>40-50<br/>years</b> | <i>IVPs</i>            | 20951           | 5650              | 15301           |
|                        | <i>EC</i>              | 242             | 224               | 18              |
|                        | <i>NonEC</i>           | 20709           | 5426              | 15283           |
|                        | <i>IVPs/per EC</i>     | 86.6            | 25.2              |                 |
|                        | <i>Triage IVPs (%)</i> |                 |                   | 72.9            |

NHI: Taiwan's National Health Insurance; IVPs: invasive procedures; EC: endometrial cancer.
